# Supplementary material for: Fluorescent microsphere immunochromatographic assays for detecting bone alkaline phosphatase based on biolayer interferometry-selected antibody
Source: Royal Society of Chemistry journal article supplement (doi:10.1039/c7ra03756b), 2017-01-01
Supplement: c7ra03756b1.pdf [file c7ra03756b1.pdf]

1  
2  
3  
4  
5  
6  
7  
8  
9  
10  
11  
12  
13  
14

*Supporting Information*

**Fluorescent Microsphere Immunochromatographic Assays for  
Detecting Bone Alkaline Phosphatase Based on Biolayer  
Interferometry-selected antibody**

Miao Liu,<sup>a</sup> Li-Feng Zeng,<sup>b</sup> Ya-Jie Yang,<sup>a</sup> Li-Ming Hu,<sup>a</sup> and Wei-Hua Lai<sup>\*a</sup>

\*Corresponding authors:

Dr. Wei-Hua Lai

State Key Laboratory of Food Science and Technology, Nanchang University

Address: 235 Nanjing East Road, Nanchang 330047, PR China

Tel.: +86 13879178802; fax: +86 791 88333708.

E-mail address: talktolaiwh@163.com

---

<sup>a</sup> State Key Laboratory of Food Science and Technology, Nanchang University,  
Nanchang 330047, China

<sup>b</sup> Department of Clinical Laboratory, Jiangxi Provincial People's Hospital, Nanchang  
330006, China

15 **Index**

16 ● Fig. S1. Schematic representative of the BLI system steps.

17 ● Experimental Section:

18 The relationship between  $K_{on}$ ,  $K_{off}$ ,  $K_D$ , and 1:1 binding model.

19 ● Fig. S2. Specificity analysis of the FM-LFIA.

20 ● Fig. S3. Stability analysis of the FM-LFIA.

21

22

23

24

25

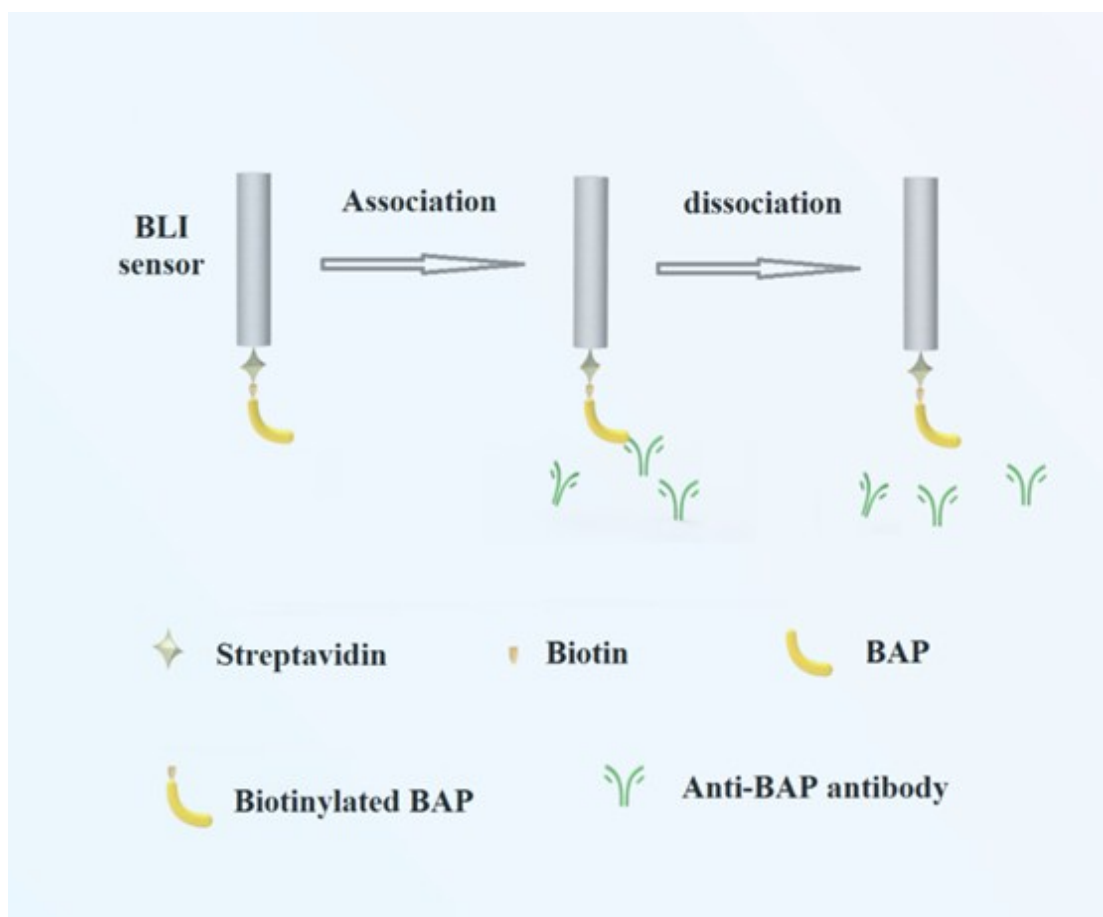

26

27 Fig. S1 Schematic representative of the BLI system steps.

28

29

30

31 The relationship between  $K_{on}$ ,  $K_{off}$ ,  $K_D$ , and 1:1 binding model  
32 The association constant (on-rate,  $K_{on}$ ), dissociation constant (off-rate,  $K_{off}$ ), and  
33 equilibrium dissociation constant ( $K_{off}/K_{on}$ ,  $K_D$ ) were calculated by the built-in BLItz  
34 software as a 1:1 binding model. The 1:1 binding model used to describe the  
35 interaction between BAP and anti-BAP mAb was represented by the equation below:

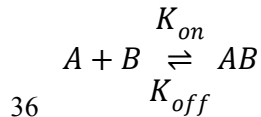

37 Where A represents the BAP immobilized on the surface of the sensor, and B is  
38 the anti-BAP mAb in PBS buffer. This 1:1 binding model assumes that one BAP  
39 molecule interacted with one anti-BAP mAb molecule. The  $K_{on}$  represents the number  
40 of AB complexes formed per second in a 1 molar solution of A and B. the term  $K_{on}$  is  
41 expressed in  $m^{-1}s^{-1}$ . The  $K_{off}$  represents the decay of AB complexes per second. The  
42 term  $K_{off}$  is expressed in  $s^{-1}$ .  $K_D$  was calculated as  $K_{on}$  divided by the  $K_{off}$ , which  
43 measures how tightly the BAP binds to its anti-BAP mAb.

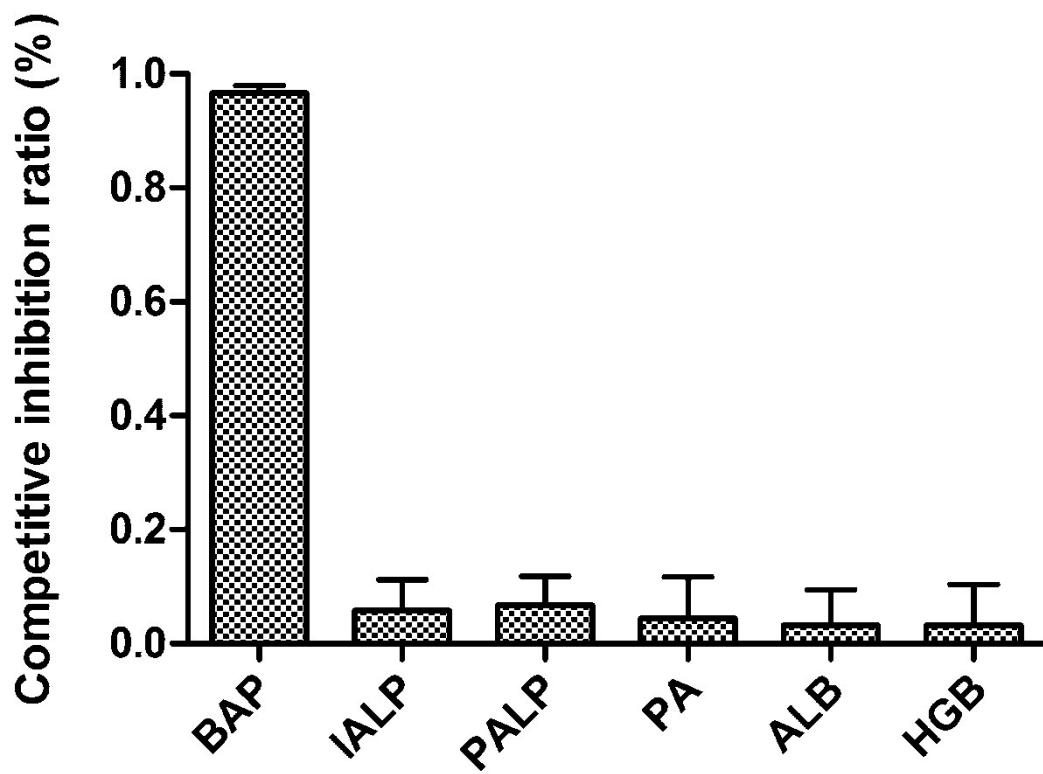

44

45 Fig. S2. Specificity analysis of the FM-LFIA. The concentration of all samples was  
46 500 ng/mL. Data were obtained from three replicates.

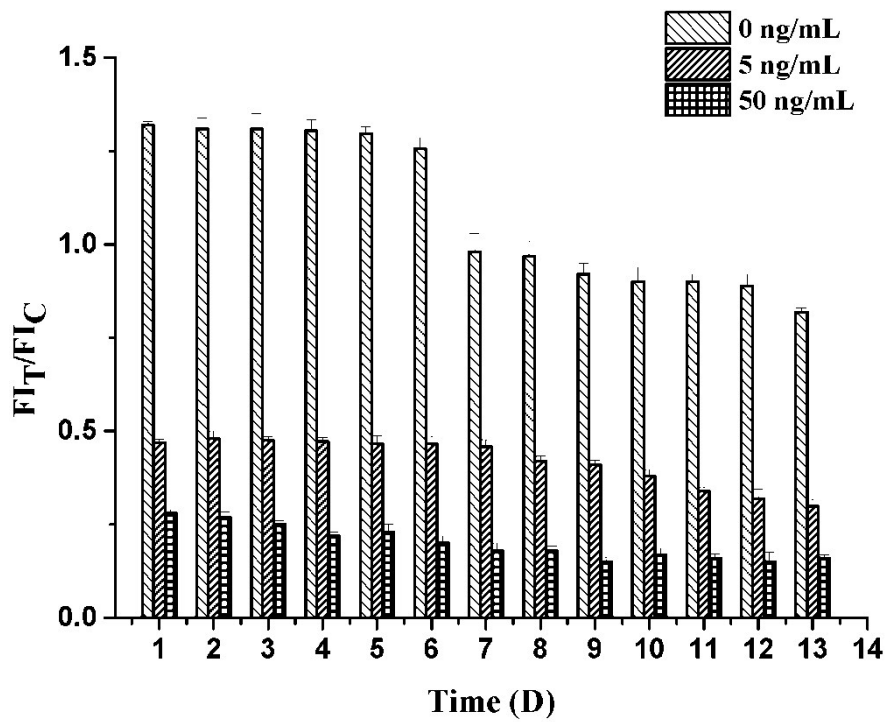

47

48 Fig. S3. Stability analysis of the FM-LFIA. Three spiked concentrations of BAP were

49 0, 5 and 50 ng/mL. Data were obtained from three replicates.
